# Supplementary material for: Self-assembly of metal–organic frameworks: From packing helical channels to 2-fold interpenetration helical layers
Source: Royal Society of Chemistry journal article supplement (doi:10.1039/c1ce05727h), 2011-01-01
Supplement: c1ce05727h.pdf [file c1ce05727h.pdf]

## Self-assembly of Metal-Organic Frameworks: From Packing Helical Channels to 2-Fold Interpenetration Helical Layers

Xing Li, Yue Bing, Mei-Qin Zha, Yun-Xiao Liang, Jian-Guo Pan and Dong-Jie Wang

### Supporting Information

**Table 1. Structure Determination Summary for 1-2**

| Complex                                                             | 1                                                                 | 2                                                                  |
|---------------------------------------------------------------------|-------------------------------------------------------------------|--------------------------------------------------------------------|
| Empirical formula                                                   | C <sub>18</sub> H <sub>23</sub> CdN <sub>5</sub> O <sub>10</sub>  | C <sub>18</sub> H <sub>21</sub> CdN <sub>5</sub> O <sub>9</sub>    |
| Formula weight                                                      | 581.81                                                            | 563.80                                                             |
| Temperature (K)                                                     | 293(2)                                                            | 293(2)                                                             |
| Wavelength (Å)                                                      | 0.71073                                                           | 0.71073                                                            |
| Crystal system, Space group                                         | Monoclinic, <i>P2(1)/n</i>                                        | Monoclinic, <i>P2/n</i>                                            |
| <i>a</i> (Å)                                                        | 9.1733(10)                                                        | 10.5156(15)                                                        |
| <i>b</i> (Å)                                                        | 10.6165(11)                                                       | 9.3977(13)                                                         |
| <i>c</i> (Å)                                                        | 24.064(3)                                                         | 23.034(3)                                                          |
| $\alpha$ (°)                                                        | 90                                                                | 90                                                                 |
| $\beta$ (°)                                                         | 90.7180(10)                                                       | 99.967(2)                                                          |
| $\gamma$ (°)                                                        | 90                                                                | 90                                                                 |
| <i>V</i> (Å <sup>3</sup> )                                          | 2343.3(4)                                                         | 2241.9(5)                                                          |
| <i>Z</i> , <i>D</i> <sub>calc</sub> (Mg·m <sup>-3</sup> )           | 4, 1.649                                                          | 4, 1.670                                                           |
| <i>F</i> (000)                                                      | 1176                                                              | 1136                                                               |
| Absorption coefficient (mm <sup>-1</sup> )                          | 0.994                                                             | 1.033                                                              |
| $\theta$ range for data collection (°)                              | 1.69 to 27.53                                                     | 1.80 to 27.59                                                      |
| Reflections collected                                               | 19870                                                             | 19006                                                              |
| Independent reflections                                             | 5358 [ <i>R</i> (int) = 0.0471]                                   | 5158 [ <i>R</i> (int) = 0.0323]                                    |
| Data [ <i>I</i> >2 $\sigma$ ( <i>I</i> )]/parameters                | 5358 / 6 / 339                                                    | 5158 / 0 / 306                                                     |
| Goodness-of-fit on <i>F</i> <sup>2</sup>                            | 1.122                                                             | 1.107                                                              |
| <i>R</i> <sub>1</sub> indices ( <i>I</i> > 2 $\sigma$ ( <i>I</i> )) | <i>R</i> <sub>1</sub> =0.0421,<br><i>wR</i> <sub>2</sub> =0.1032  | <i>R</i> <sub>1</sub> = 0.0370,<br><i>wR</i> <sub>2</sub> = 0.1280 |
| <i>wR</i> <sub>2</sub> indices (all data)                           | <i>R</i> <sub>1</sub> =0.0447,<br><i>wR</i> <sub>2</sub> = 0.1048 | <i>R</i> <sub>1</sub> = 0.0414,<br><i>wR</i> <sub>2</sub> = 0.1350 |
| Largest diff. peak and hole (e Å <sup>-3</sup> )                    | 1.412 and -1.372                                                  | 1.211 and -0.841                                                   |

Table 2. Selected bond lengths (Å) and angles (°) for compounds **1** – **2**.

| <b>1</b>                                                                                |            |                   |            |                   |            |
|-----------------------------------------------------------------------------------------|------------|-------------------|------------|-------------------|------------|
| Cd(1)-O(1)                                                                              | 2.249(3)   | Cd(1)-N(5)#1      | 2.277(3)   | Cd(1)-N(2)#2      | 2.285(3)   |
| Cd(1)-N(4)                                                                              | 2.345(3)   | Cd(1)-O(7)        | 2.500(3)   |                   |            |
| O(1)-Cd(1)-N(5)#1                                                                       | 103.94(12) | O(1)-Cd(1)-N(2)#2 | 110.02(10) | N(4)-Cd(1)-O(7)   | 157.18(10) |
| O(1)-Cd(1)-N(4)                                                                         | 121.65(11) | N(5)#1-Cd(1)-N(4) | 91.94(11)  | N(2)#2-Cd(1)-N(4) | 86.04(10)  |
| O(1)-Cd(1)-O(7)                                                                         | 80.87(10)  | N(5)#1-Cd(1)-O(7) | 85.27(10)  | N(2)#2-Cd(1)-O(7) | 82.12(10)  |
| Symmetry codes: #1 -x+3/2, y-1/2, -z+1/2; #2 -x+1, -y+1, -z+1; #3 -x+3/2, y+1/2, -z+1/2 |            |                   |            |                   |            |
| <b>2</b>                                                                                |            |                   |            |                   |            |
| Cd(1)-O(1)#1                                                                            | 2.229(3)   | Cd(1)-N(1)        | 2.287(2)   | Cd(1)-N(5)#2      | 2.312(2)   |
| Cd(1)-N(4)                                                                              | 2.363(3)   | Cd(1)-O(5)        | 2.430(2)   |                   |            |
| O(1)#1-Cd(1)-N(1)                                                                       | 111.12(11) | N(4)-Cd(1)-O(5)   | 162.67(10) | N(1)-Cd(1)-N(5)#2 | 138.84(9)  |
| O(1)#1-Cd(1)-N(4)                                                                       | 116.81(11) | N(1)-Cd(1)-N(4)   | 87.52(9)   | N(5)#2-Cd(1)-N(4) | 90.53(10)  |
| O(1)#1-Cd(1)-O(5)                                                                       | 80.37(8)   | N(1)-Cd(1)-O(5)   | 83.30(9)   | N(5)#2-Cd(1)-O(5) | 86.30(9)   |
| Symmetry codes: #1 -x+1, -y+1, -z+1; #2 -x+3/2, y-1, -z+1/2; #3 -x+3/2, y+1, -z+1/2     |            |                   |            |                   |            |

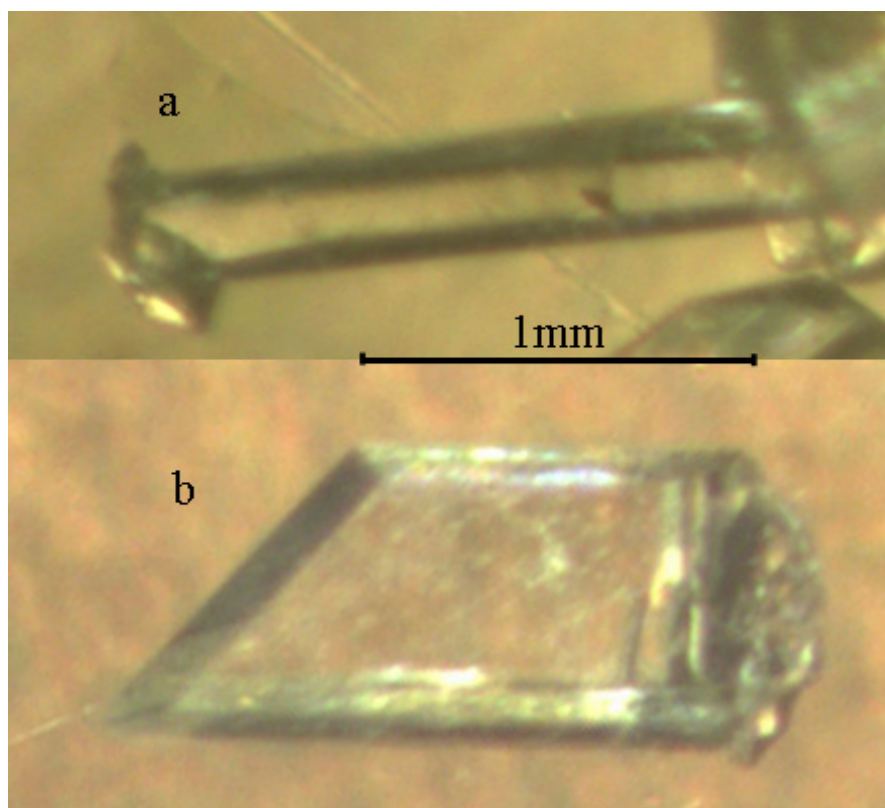

Figure S1. (a) for complex **1**; (b) for **2**.

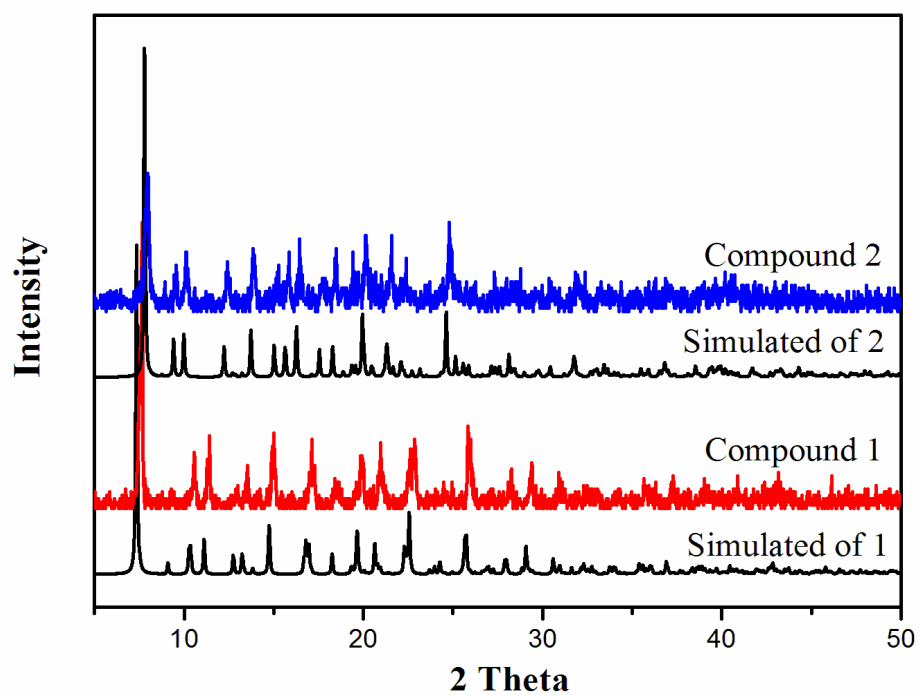

**Figure S2.** Experimental and simulated powder XRD patterns of **1** and **2**.

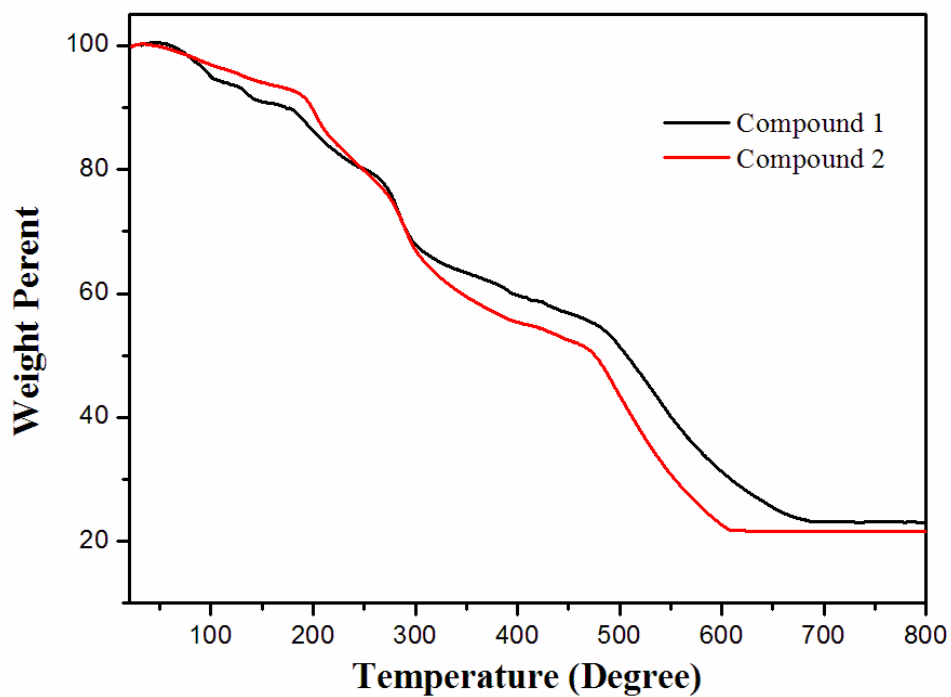

**Figure S3.** The thermogravimetric analyses patterns of **1** and **2**.

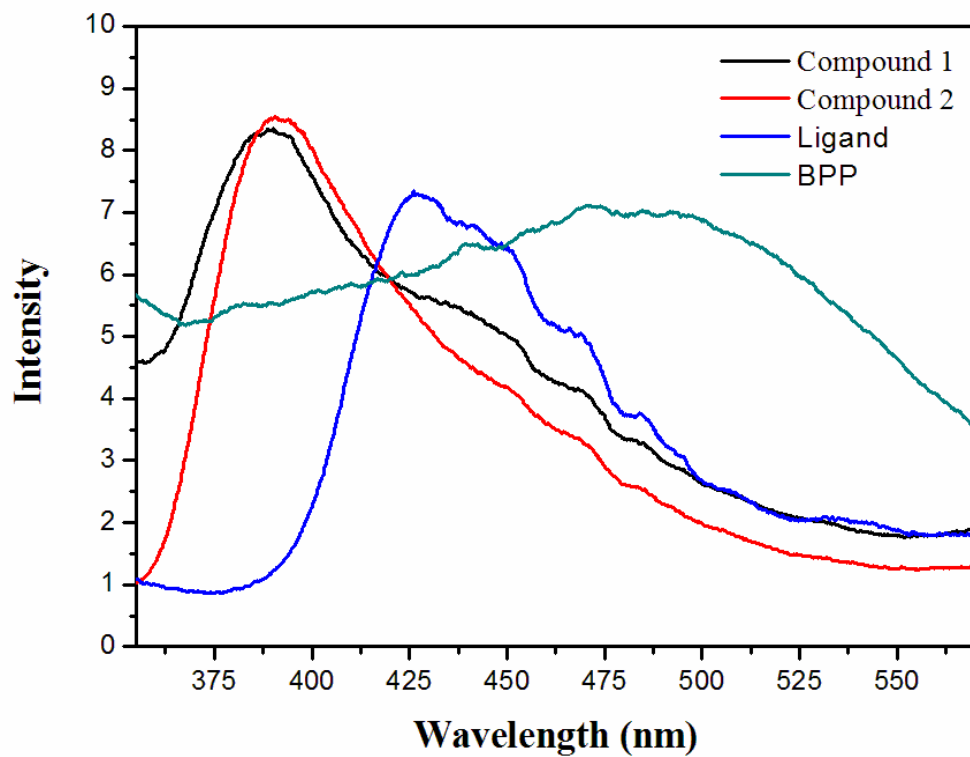

**Figure S4.** The solid-state emission spectra of organic ligands, **1** and **2** at room temperature.
